# Supplementary material for: Sleep habits, academic performance, and the adolescent brain structure
Source: PubMed Central journal article supplement (PMC5299428; doi:10.1038/srep41678), 2017-02-09

## **Sleep habits, academic performance, and the adolescent brain structure**

Anna S. Urrila, Eric Artiges, Jessica Massicotte, Ruben Miranda, H el ene Vulser, Pauline B ezivin-Frere, Winok Lapaire, Herv e Lema tre, Jani Penttil a, Patricia J Conrod, Hugh Garavan, the IMAGEN consortium, Marie-Laure Paill ere Martinot, and Jean-Luc Martinot

## **Supplemental information**

## Discussion

### Supplementary table S1

Spearman rank correlation coefficients for sleep habits and participant characteristics.

| TIB | WE | TIB    | WD | Wake up<br>time WE | Wake up<br>time WD | Bedtime<br>WE | Bedtime<br>WD | School grade<br>average | IQ      | PDS     | Gender  |
|-----|----|--------|----|--------------------|--------------------|---------------|---------------|-------------------------|---------|---------|---------|
|     |    |        |    |                    |                    |               |               |                         |         |         | 1       |
|     |    |        |    |                    |                    |               |               |                         |         | 1       | -.549** |
|     |    |        |    |                    |                    |               |               |                         | 1       | -.110   | .077    |
|     |    |        |    |                    |                    |               |               | 1                       | -.411** | -.175   | .273**  |
|     |    |        |    |                    |                    |               | 1             | .121                    | -.052   | .134    | .054    |
|     |    |        |    |                    |                    | 1             | .659**        | .261**                  | -.084   | .045    | .186*   |
|     |    |        |    |                    | 1                  | .008          | .058          | .052                    | -.052   | -.137   | .086    |
|     |    |        |    | 1                  | .098               | .405**        | .321**        | .131                    | -.201** | .005    | .073    |
|     |    | 1      |    | -.204**            | .374**             | -.532**       | -.839**       | -.046                   | .003    | -.199** | .009    |
|     | 1  | .251** |    | .521**             | .097               | -.445**       | -.261**       | -.055                   | -.115   | -.058   | -.092   |

Significant correlations are marked with \* at the p<0.05 level and \*\* at the p<0.01 level. PDS = pubertal; Development Scale; IQ = intelligence quotient; WD = weekdays; WE = weekends; TIB = time in bed. Gender is described as 1 = girl; 2 = boy; school grade average is described on a scale from 1 to 8 where 1 = very good, 8 = very poor.

**Supplementary table S2.** Regional correlations between sleep habits and grey matter volumes in a subsample of 149 community adolescents without any probable psychiatric diagnosis according to the DAWBA questionnaire.

| Brain region                               | BA     | Cluster |          | Peak voxel      |     |     | p <sup>a</sup> | t      |
|--------------------------------------------|--------|---------|----------|-----------------|-----|-----|----------------|--------|
|                                            |        | k       | p        | MNI coordinates |     |     |                |        |
|                                            |        |         |          | x               | y   | z   |                |        |
| <b><i>Wake up time during weekends</i></b> |        |         |          |                 |     |     |                |        |
| Anterior cingulate L                       | 32     | 3327    | 8.90E-04 | -3              | 36  | -11 | 7.37E-06       | 4.49   |
| Frontal medial orbital L                   | 32     |         |          | 0               | 33  | 31  | 2.22E-04       | 3.60   |
| <b><i>Bedtime during weekends</i></b>      |        |         |          |                 |     |     |                |        |
| Precuneus R                                | 7      | 1668    | 0.018    | 9               | -36 | 34  | 9.28E-04       | * 4.97 |
| Paracentral lobule L                       | 5      |         |          | -12             | -33 | 52  | 7.81E-05       | 3.88   |
| Middle frontal gyrus R                     | 8/9/10 | 2299    | 0.0053   | 34              | 30  | 34  | 8.31E-08       | * 5.50 |
| Parahippocampal R                          | 20     | 1659    | 0.019    | 38              | -21 | -23 | 4.33E-05       | 4.04   |
| Inferior temporal R                        | 20/36  |         |          | 48              | -37 | -18 | 5.01E-05       | 4.00   |

a. Height threshold  $p < 0.001$ ; cluster extent threshold  $p < 0.05$  FWE corrected ( $k > 1200$  voxels). \* Height threshold  $p < 0.05$  Family Wise Error (FWE) corrected. BA = Brodmann Area; k = cluster size; MNI = Montreal neurological Institute coordinates in millimeters; R = right; L = left. MNI coordinates are given for the voxel of maximal statistical significance.

## Methods

**Supplementary table S3.** Assessment of school grade average; correspondence of the English and French questionnaires.

| language     | Question                                                                                | Response scale                                                                                                                     |
|--------------|-----------------------------------------------------------------------------------------|------------------------------------------------------------------------------------------------------------------------------------|
| English (UK) | 'Which of the following best describes your average grade in the end of the last term?' | 1) A (93-100)<br>2) A- (90-92)<br>3) B+ (87-89)<br>4) B (83-86)<br>5) B- (80-82)<br>6) C+ (77-79)<br>7) C (73-76)<br>8) C- (70-72) |
| French       | 'Quelle a été ta moyenne générale (approximativement) à la fin du dernier trimestre?'   | 1) 16-20<br>2) 14-15<br>3) 12-13<br>4) 10-11<br>5) 8-9<br>6) 6-7<br>7) 4-5<br>8) 0-3                                               |

**Supplementary figure S1.** Bilateral correlations between bedtime during weekends and GMV in the hippocampal regions. Analyses performed with a height threshold  $p=0.001$  and an extent threshold = 50 voxels. Crosshair indicates left hippocampus at MNI coordinates  $x, y, z: -26, -21, -20$  ( $t = 3.73; p = 1.28 \text{ E-}04$ ); right parahippocampus is at MNI coordinates  $x, y, z: 37, -19, -21$  ( $t = 3.97; p = 5.17 \text{ E-}05$ ).

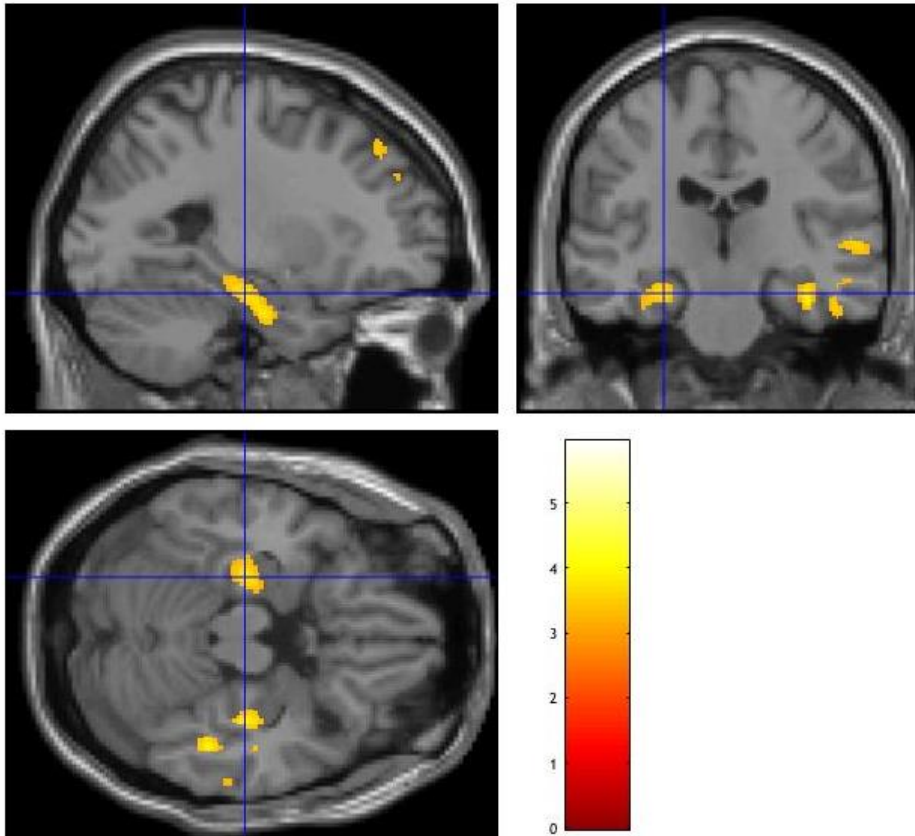

**Supplementary figure S2.** Bilateral correlations between weekday time in bed and GMV in the hippocampal regions. Analyses performed with a height threshold  $p=0.001$  and an extent threshold = 50 voxels. Crosshair indicates left hippocampus at MNI coordinates  $x, y, z: -27, -21, -20$  ( $t = 3.29; p = 5.99 \text{ E-}04$ ); right parahippocampus is at MNI coordinates  $x, y, z: 38, -22, -21$ , ( $t = 3.61; p = 2.04 \text{ E-}04$ ).

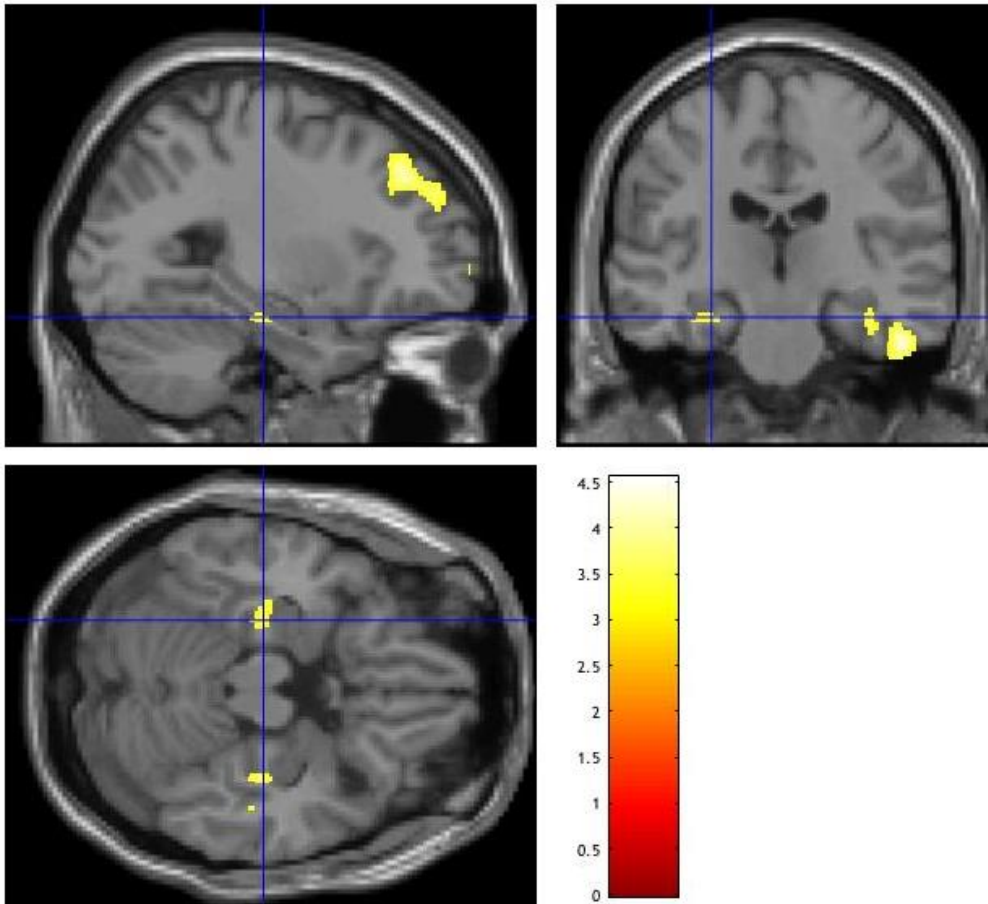

Supplement: srep41678-s1.pdf [file srep41678-s1.pdf]
